1 **Co-evolved maternal effects selectively eliminate offspring depending on resource availability**

2

3 Bin-Yan Hsu<sup>1,2\*</sup>, Martina S. Müller<sup>1,3</sup>, Christoph L. Gahr<sup>1,4</sup>, Cor Dijkstra<sup>1†</sup>, Ton G. G. Groothuis<sup>1</sup>

4 <sup>1</sup> Behavioural Biology, Groningen Institute for Evolutionary Life Sciences, University of Groningen,

5 Nijenborgh 7, 9747 AG, Groningen, the Netherlands

6 <sup>2</sup> Department of Biology, University of Turku, 20014, Turku, Finland

7 <sup>3</sup> Department of Natural Resource Sciences, University of Rhode Island, Kingston, Rhode Island,

8 02881, United States

9 <sup>4</sup> Department of Evolutionary Ecology, Max Planck Institute for Evolutionary Biology, 24306 Plön,

10 Germany

11 \* Corresponding author: [biyahs@utu.fi](mailto:biyahs@utu.fi)

12 † deceased

13 **Abstract**

14 Many plants and animals adaptively downsize the number of already-produced propagules if  
15 resources become insufficient to raise all of them. In birds, mothers often induce hatching asynchrony  
16 by incubating first eggs before last eggs are laid, creating an age/size hierarchy within broods which  
17 selectively eliminates the smallest chicks in poor food conditions. However, mothers also deposit  
18 more testosterone into late-laid eggs, which boosts competitive abilities of younger chicks,  
19 counteracts the competitive hierarchy, and ostensibly creates a paradox. Since testosterone also carries  
20 costs, we hypothesized that benefits of maternally deposited testosterone outweigh its costs in good  
21 food conditions, but that testosterone has a net detrimental effect in poor food conditions. We found  
22 experimental evidence that elevated maternal testosterone in the egg caused higher chick mortality in  
23 poor food conditions but better chick growth in good food conditions. These context-dependent  
24 effects resolve the paradox, suggesting co-evolution of two maternal effects, and explain inconsistent  
25 results of egg hormone manipulations in the literature.

26

27 **Keywords**

28 Food conditions, Hatching asynchrony, Maternal effects, Maternal testosterone, Sibling competition

## 29 **Introduction**

30           Throughout the plant and animal kingdoms, mothers routinely overproduce propagules, and  
31 competition between them culls superfluous offspring until family size matches available resources<sup>1,2</sup>,  
32 thereby neatly (albeit harshly) resolving the evolutionary trade-off between offspring quantity and  
33 quality. The severity of resource limitation determines the intensity of propagule competition; when  
34 food is scarce, siblings die, e.g. by siblicide in spotted hyena broods<sup>3,4</sup> and blue-footed booby chicks<sup>5</sup>,  
35 intra-fruit seed abortion in plants<sup>6</sup>, maternal crushing and/or starvation in piglets<sup>7,8</sup>, or sibling  
36 cannibalism in ladybird beetles<sup>9</sup>. Mothers can improve the efficiency with which sibling rivalry  
37 eliminates offspring by creating age/size hierarchies among their young that make some siblings less  
38 able to compete than others, allowing efficient culling of their numbers when needed. For example, in  
39 birds, mothers induce hatching asynchrony by initiating incubation before all eggs have been laid.  
40 This causes chicks from later-laid eggs to have a later start on development, to hatch later, and  
41 therefore to be smaller and weaker when competing with their older siblings for parental food  
42 provisioning.

43           Mothers also employ other tools for creating competitive asymmetries, including furnishing  
44 their embryos with maternal hormones<sup>10</sup>. Such hormone-mediated maternal effects have substantial  
45 and long-lasting impacts on the development of morphology, brain and behaviour<sup>10,11</sup> and are  
46 important in plants<sup>12</sup>, insects<sup>13</sup>, reptiles<sup>14</sup>, fish<sup>15</sup> and other vertebrates<sup>10,16</sup>. For example, in spotted  
47 hyenas, cubs from high-ranked mothers are exposed prenatally to higher levels of maternal androgens  
48 via the placenta, which makes them more aggressive after birth<sup>17</sup>. In birds, maternal androgens, like  
49 testosterone (a potent sex steroid hormone) are deposited into eggs in substantial quantities that vary  
50 systematically with environmental conditions and also according to the position of the egg in the  
51 laying sequence in a given breeding attempt (i.e. clutch)<sup>18,19</sup>. Because in most bird species, later-laid  
52 eggs contain higher concentrations of maternal androgens, the hatching asynchrony adjustment  
53 hypothesis (HAAH)<sup>18,19</sup> proposes that this increased deposition of maternal androgens in late-laid  
54 eggs functions as a compensation for the competitive disadvantage of the chicks from these eggs.  
55 Indeed, experimental manipulation of egg androgens, especially testosterone, has revealed that these

56 hormones stimulate the competitive ability of the chick and this has become a well-cited example of  
57 hormone-mediated adaptive maternal effects<sup>19-23</sup>.

58 The avian system of hatching asynchrony and maternal egg yolk hormones thus provides an  
59 excellent study model for the interactions of two maternal effects. It also reveals a significant paradox  
60 that has not yet been addressed adequately: if hatching asynchrony itself is an adaptive mechanism to  
61 achieve efficient brood reduction by sibling competition depending on the amount of food available<sup>1,24</sup>,  
62 why would mothers counteract this by increased androgen deposition in the later-laid eggs<sup>25,26</sup>?

63 As the research effort in this field grows rapidly, evidence that maternal androgens in egg  
64 yolks do not always counteract the effects of hatching asynchrony has accumulated. An increasing  
65 number of studies also found inconsistent effects from the experimental elevation of egg androgen  
66 concentrations, with sometimes opposite effects in the same species<sup>23</sup>. Rather than raising doubt about  
67 the adaptive explanations on within-clutch difference of maternal androgens, these inconsistent effects  
68 open up the possibility for an intriguing potential resolution to the HAAH paradox. Yolk androgen  
69 has been demonstrated to have both beneficial and detrimental effects. Thus, yolk androgens may  
70 have different effects depending on the food availability, and the androgens may act in concert with  
71 the effects of hatching asynchrony, which are also dependent on food availability. Egg androgens and  
72 hatching asynchrony together may then facilitate chick survival in good food conditions and promote  
73 brood reduction in poor food conditions.

74 Yolk androgen provides important benefits by increasing competitive ability in chicks<sup>23</sup>, but  
75 it can also impose significant costs, such as increased resting metabolic rate in the short- and long-  
76 term<sup>27-29</sup>, suppressed immune function<sup>30-34</sup> and oxidative damage<sup>35-39</sup>. We expect higher maternal  
77 androgen to undermine survival in a year when resources are insufficient to offset its costs, but in a  
78 year when food is abundant, higher maternal androgen exposure may help chicks obtain enough food  
79 to offset the higher energy expenditure and the challenge to their immune system, and help them  
80 survive.

81 We therefore hypothesize that androgens in eggs promote adaptive resource-dependent brood  
82 reduction<sup>26</sup>. If so, two pathways have co-evolved that allow mothers to facilitate resource-dependent

83 brood reduction: in poor-food years, one pathway culls the brood to preserve offspring quality, and in  
84 good-food years, the other pathway promotes survival to maximize offspring quantity. Combined,  
85 these two pathways maximize the reproductive value of the brood in all food conditions. The key to  
86 testing these resource-dependent effects of egg yolk androgens would be to combine a manipulation  
87 of yolk androgens at the time of egg-laying, mimicking elevated maternal androgen deposition, and a  
88 manipulation of food availability during the chick rearing phase, in a full factorial design. To our  
89 knowledge, no such experiment has been conducted to test our hypothesis.

90 We performed this experiment in rock pigeons (*Columba livia*), an excellent species for our  
91 study for two reasons: (1) its modal clutch size is two<sup>40</sup> with the second egg always containing much  
92 higher amounts of testosterone in the yolk than the first one<sup>41,42</sup>, and (2) it displays substantial  
93 hatching asynchrony and the second chick is always smaller than the first one. In this study, we  
94 created experimental clutches of first-laid eggs only, which contain low levels of maternal  
95 testosterone. One egg was injected with testosterone solution to increase testosterone levels to those of  
96 second-laid eggs, and the other was injected with vehicle as control. Both eggs were given to foster  
97 parents and half of the resulting broods were reared in experimentally-imposed poor food conditions  
98 while the other half were raised in good food conditions. Over the nestling period, we monitored  
99 various aspects of growth and development as well as immune function and survival of the chicks. We  
100 expected to see beneficial effects of elevated yolk testosterone on chick growth and immune function  
101 under the good food condition, and detrimental effects under the poor food condition, specifically,  
102 increased early mortality of chicks.

## 103 **Materials and Methods**

104 We used pigeons from our rock pigeon colony housed in a large outdoor aviary. Before the  
105 experiment started (early April, 2012), breeding pairs of adult pigeons were re-housed in smaller  
106 identical aviaries, with two pairs in each aviary (see Supplementary Material for housing details). All  
107 experimental and animal care procedures were under the approval of the animal welfare committee of  
108 University of Groningen (DEC No. 5635D) and complied with Dutch law.

109

### 110 *Egg collection, incubation, hatching time and the creation of experimental broods*

111 In May (the annual peak of egg laying), we made the nest boxes available to induce breeding.  
112 We checked nest boxes every morning and marked and collected all freshly-laid eggs, and replaced  
113 with a dummy egg so parents would start incubating. To increase the sensitivity of our experimental  
114 design, we aimed at creating experimental broods consisting of chicks of opposite treatments  
115 (testosterone or control injection) that were matched as much as possible in body mass, sex and  
116 hatching time. We only used first-laid eggs (1<sup>st</sup> eggs) in the experiment. Collected eggs were stored in  
117 a climate cell with relatively constant temperature (12-16°C) and humidity (40-50%) for no more than  
118 three days, until a large enough batch of eggs had been collected for creating experimental pairs. We  
119 paired eggs by matching laying date and mass as closely as possible, and then injected one egg in each  
120 pair with testosterone dissolved in sesame oil that increased levels in these 1<sup>st</sup> eggs up to the level of  
121 the 2<sup>nd</sup> eggs (testosterone eggs, see *Egg injections* in Supplementary Material) and injected the other  
122 with sesame oil only (control eggs). After injection, these eggs were returned immediately to an  
123 unrelated foster nest for incubation. The mass of testosterone-eggs and control-eggs did not differ  
124 significantly (mean±SD: testosterone-eggs, 17.00±1.27 g, n=95; control-eggs, 17.07±1.38 g, n=95;  
125  $t=0.383$ ,  $p=0.7021$ ), nor laying date (Mann-Whitney U test,  $p=0.9779$ ).

126 On day 16 of incubation (about two days before hatching), all eggs were placed into an  
127 incubator until hatching and replaced in the nest by dummy eggs. The incubator was maintained at a  
128 constant 37.5 °C with humidity > 75%. We checked the incubator every four hours between 9 am and  
129 9 pm. We estimated hatching of hatchlings found at 9 am by the dryness of the down feathers as either

130 at 3 am (with relatively dry down) or at 7 am (with wetter down). We measured body mass, head-bill  
131 length, tarsus length, and wing length of each hatchling, and took a small blood sample (< 75µl) from  
132 the medial metatarsal vein for sexing. We sexed the hatchlings with a molecular sexing procedure  
133 following the protocol described in Goerlich et al. (2009, 2010)<sup>41,43</sup>. We then matched hatchlings with  
134 opposite egg injection treatments in pairs by their hatching time and body mass, and returned paired  
135 hatchlings to unrelated foster nests. We successfully created 19 same-sex testosterone-control pairs of  
136 chicks with no significant difference in hatching time (n=29, t=-1.79, p=0.084) or body mass (t=-  
137 1.229, p=0.229). Ten pairs were fostered by parents under good food conditions and 9 pairs by parents  
138 under poor food conditions.

139

#### 140 *Food treatment*

141 We initiated the food treatment for parents on day 16 of incubation. Prior to the food  
142 treatment, a commercial seed mixture (KASPER<sup>TM</sup> 6721 + 6712, Table S1), water, and a mixture of  
143 small stones and pigeon grit was available *ad libitum* to all pigeons. From the start of the food  
144 treatment onwards, pigeons in the good food condition group were also additionally provided with *ad*  
145 *libitum* pigeon pellets (KASPAR<sup>TM</sup> P40, Table S1) and supplemented with vitamin powder  
146 (Supralith<sup>TM</sup>). The food availability of the pigeons in poor food conditions was limited to 33 g of the  
147 seed mixture with broken corn kernels (lower protein and fat content, Table S1) per pair per day, the  
148 amount of average daily food consumption by a pair of adult pigeons according to our previous  
149 measurements. To accommodate increased energy demands as chicks grew, we provided the food-  
150 restricted group with additional food when chicks were older than one week, based on Jacquin et al.  
151 (2012)<sup>44</sup>. For every 7-day-old or older chick, we provided 8 g additional food; for every 14-day-old or  
152 older chick, 16 g of additional food was provided.

153 After the experiment, the body mass loss in adult pigeons in poor food conditions was  
154 significantly more than that of adults in good food conditions [good food condition, mean (% of body  
155 mass before egg-laying)±SE = -6.31±0.75, n=67; poor food condition, mean±SE = -13.77±1.16, n=45,

156  $t=5.395$ ,  $p<0.0001$ ], indicating that our experimental food restriction significantly reduced energy  
157 intake to the adults.

158

### 159 *Chick monitoring*

160 Nests were checked every day to monitor chick survival. Four biometric variables: body mass,  
161 head-bill length, tarsus length, and wing length were measured every two days in the first two weeks  
162 after hatching, and every three days from two weeks to 26 days post-hatching. All body measurements  
163 were taken by the same experimenter (the first author). We use SRBC test and hemagglutination assay  
164 to measure the humoral immune response of the experimental chicks shortly after fledging (37-45  
165 days old). Pre-treatment blood samples were taken right before SRBC inoculation. Post-treatment  
166 samples were taken six days later. See supplementary material for details.

167

### 168 *Statistical analysis*

169 All statistical analyses were performed with the software R 3.5.2<sup>45</sup>. We used a binomial linear  
170 model to test the effects of treatment on hatching success, with hormone injection and egg mass as  
171 predictors. We performed a Mann-Whitney U test to test for effects on hatching time, because it was  
172 not normally-distributed (Fig. S1). We analysed hatchling body mass using a general linear model  
173 (GLM), including hormone injection, egg mass, and sex as predictors and also tested for sex-specific  
174 effects of prenatal testosterone on hatchling body mass by including the interaction between hormone  
175 injection and sex.

176 We only tested the effects of treatment on chick body measurements until day 8, because the  
177 sample size for testosterone chicks in the poor food condition after day 8 decreased drastically due to  
178 the high mortality in this group (see *Results*), yielding low statistical power and potential  
179 computational problems if analysing the whole growth curve. In addition, for chicks reared in good  
180 food conditions we also tested the effect of testosterone on each body measurement at day 26, just  
181 before fledging. We used a general linear mixed model (R package *lme4*)<sup>46</sup>, and Kenward-Roger  
182 approximation method to compute p-values (R package *pbkrtest*)<sup>47</sup>. We included brood identity as a



183 random factor, and hormone treatment, food treatment, and sex as fixed factors. We also included egg  
184 mass as a covariate, as it is known to strongly influence nestling body mass<sup>48</sup>. The interactions  
185 between hormone and food treatment (for day 8 only), and between hormone treatment and sex (for  
186 both day 8 and day 26) were also tested. Significant interactions were then further analysed with the  
187 package *phia*<sup>49</sup> for pair-wise comparisons (Holm-adjusted p-values are presented). The results of the  
188 four biometric variables showed clear consistency with each other, with effects on body mass being  
189 the most pronounced. Therefore, only the results of growth in terms of body mass are reported below  
190 and the other three (head-bill, tarsus and wing length) are reported in the supplementary materials.

191 For our analyses of immune response, we subtracted for each chick the pre-treatment score  
192 from the final score of the SRBC-hemagglutination test. We applied a GLM to the resulting values,  
193 with hormone injection, food treatment, and sex included as independent variables. The model  
194 residuals did not violate assumptions of normality (Shapiro-Wilk test,  $p=0.492$ ). The interactions of  
195 hormone injection with sex and hormone injection with food were also tested.

196 Chick survival was assessed between hatching to day 26, yielding right-censored data.  
197 Kaplan-Meier survival curves for pigeons hatched from the testosterone-injected and control eggs and  
198 reared under good and poor food conditions were built and tested using the package *survival*<sup>50</sup> with  
199 Gehan-Wilcoxon test and  $\rho = 1$ .

## 200 **Results**

### 201 *Hatching success, hatching time, and hatchling body mass*

202 We injected a total of 190 eggs (95 testosterone-injected eggs and 95 control eggs) of which  
203 93 eggs hatched successfully (48.95%). Of those 93 eggs, 44 were control eggs and 49 were  
204 testosterone-injected eggs and this difference was not significant ( $n=190$ ,  $p=0.407$ ). Heavier eggs  
205 were more likely to hatch successfully (estimate $\pm$ SE =  $0.338\pm 0.117$ ,  $z=2.895$ ,  $p=0.004$ ). There was no  
206 difference in time of hatching between testosterone-injected and control eggs (Mann-Whitney U test,  
207  $W=1080$ ,  $p=0.991$ ).

208 Of the 93 hatchlings, 90 had no visible developmental abnormalities and were included in the  
209 analysis of hatching body mass. Testosterone treatment did not affect hatchling body mass (marginal  
210 means $\pm$ SE: hatchlings from testosterone-injected eggs,  $11.58\pm 0.11$ ; control hatchlings,  $11.78\pm 0.11$ ,  
211  $t=-1.291$ ,  $p=0.200$ ) and hatchling body mass was also not affected by sex (marginal means $\pm$ SE: males,  
212  $11.66\pm 0.11$ ; females,  $11.70\pm 0.11$ ,  $t=-0.281$ ,  $p=0.780$ ) or the interaction between sex and hormone  
213 treatment ( $p = 0.971$ ). Only egg mass significantly predicted hatchling body mass (estimate $\pm$ SE =  
214  $0.612\pm 0.060$ ,  $t=10.152$ ,  $p<0.001$ ).

215

### 216 *Chick survival*

217 Among the 90 hatchlings, we successfully created 19 same-sex testosterone-control pairs of  
218 chicks with 10 pairs reared under good food conditions and 9 pairs under poor food conditions. Their  
219 survival rates differed significantly among the four combinations of food treatment and testosterone  
220 injection ( $p<0.001$ , Fig. 1). In the good food conditions, chick survival was 100% ( $n=20$ ), regardless  
221 of hormone treatment, while in the poor food conditions, chicks from testosterone-injected eggs  
222 (hereafter “testosterone chicks”) had lower survival than chicks from control eggs (hereafter “control  
223 chicks”) did ( $n=18$ ,  $\chi^2=3.9$ ,  $p=0.049$ , Fig. 1). Overall, chicks reared under the poor food conditions  
224 had significantly lower survival than those under the good food conditions ( $n=38$ ,  $\chi^2=12.8$ ,  $p<0.001$ ).

225

### 226 *Body mass at day 8 and day 26 after hatching*

227 For day-8 body mass, the mixed model showed that the interaction effect of testosterone  
228 injection and food treatment was significant ( $F_{1,16.66}=6.758$ ,  $p=0.019$ , Fig. 2). Post-hoc interaction  
229 analysis indicated that testosterone chicks were heavier (marginal mean $\pm$ SE = 120.49 $\pm$ 4.42 g) than  
230 control chicks (marginal mean $\pm$ SE = 103.69 $\pm$ 4.42 g) in the good food conditions ( $\chi^2=10.577$ , Holm-  
231 adjusted  $p=0.002$ ), but not in the poor food conditions (marginal means $\pm$ SE = 55.74 $\pm$ 4.69 g for  
232 testosterone chicks; 58.66 $\pm$ 4.63 g for control chicks,  $\chi^2=0.277$ , Holm-adjusted  $p=0.599$ ). The effect of  
233 sex was not significant (marginal means $\pm$ SE: males, 85.84 $\pm$ 3.75 g; females, 83.45 $\pm$ 3.59 g,  
234  $F_{1,15.32}=0.169$ ,  $p=0.687$ ), nor was the interaction effect of testosterone treatment and sex ( $F_{1,16.40}=0.923$ ,  
235  $p=0.351$ ).

236 For body mass at day 26, when chicks were about to fledge, we found that of the chicks  
237 reared in the good food conditions, testosterone chicks were still on average 10.9 g (SE=5.60) heavier  
238 than control chicks, but the effect was not statistically significant ( $F_{1,8.55}=3.788$ ,  $p=0.085$ , Fig. 3).  
239 Neither sex nor egg mass showed significant effects at this age ( $p=0.312$  and 0.397, respectively) and  
240 there was no interaction between testosterone treatment and sex ( $p=0.276$ ).

241

#### 242 *Immunocompetence*

243 Among the same-sex broods that survived to complete the SRBC tests ( $n=28$ ), the  
244 testosterone fledglings showed significantly lower immune response against SRBC ( $n=13$ , marginal  
245 mean $\pm$ SE = 2.05 $\pm$ 0.75) than did control fledglings ( $n=15$ , marginal mean $\pm$ SE = 4.08 $\pm$ 0.68,  $t=-2.030$ ,  
246  $p=0.041$ , Fig. 4). Food restriction also showed a significant negative effect on the immune response  
247 (marginal means $\pm$ SE = 5.18 $\pm$ 0.56 for fledglings reared under the good food conditions, 0.95 $\pm$ 0.91 for  
248 fledglings reared under the poor food conditions,  $t=-4.230$ ,  $p<0.001$ , Fig. 4). The interaction between  
249 hormone and food treatment, however, did not have significant effects ( $p=0.396$ ). There was no  
250 significant sex difference ( $p=0.101$ ) or interaction between hormone treatment and sex ( $p=0.333$ ).

251 **Discussion**

252           Despite the fact that hatching asynchrony has been regarded as an adaptive maternal effect for  
253 optimizing the trade-off between offspring quantity and quality in different food conditions, maternal  
254 androgens in birds have been proposed as a tool for mothers to counteract the effects of hatching  
255 asynchrony<sup>18,19</sup>. This conceptual paradox, although put forward more than a decade ago<sup>19</sup>, still lacks  
256 sufficient effort to find a solution. The paradox could be resolved if maternal androgens have context-  
257 dependent effects, much like the context-dependent effects that hatching asynchrony has on survival  
258 of late-hatching offspring in good and poor food conditions. In this scenario, both maternal effects  
259 work together to downsize the brood when food is scarce by selectively hastening the death of the  
260 youngest offspring, and, when food is abundant, help rather than harm survival of late-hatching  
261 offspring by giving them, via maternal androgens, a boost in competing for food. Our findings support  
262 this idea: exposure to elevated yolk testosterone benefitted nestlings under good food conditions by  
263 enhancing growth (Fig. 2, 3), but caused higher mortality when food conditions were poor (Fig. 1).  
264 This is the first experimental evidence from a full factorial design that supports the notion of adaptive  
265 context-dependent effects of maternal hormones. It is also the first evidence that solves a long  
266 standing paradox in the field of hormone-mediated maternal effects, reconciling the seemingly  
267 opposing effects of hatching asynchrony and differential testosterone allocation to offspring. It shows  
268 that maternally engineered competitive asymmetries within broods arise from variation in yolk  
269 androgens and hatching asynchrony together, and allow parents to maximize the number of offspring  
270 they rear<sup>26</sup>. Moreover, in a system in which two maternal effects work in concert, mothers do not need  
271 to adjust the within-clutch pattern of testosterone deposition in relation to food abundance. As the  
272 effects of testosterone are context dependent, they can simply maintain higher testosterone  
273 concentrations in late-laid eggs regardless of pre egg-laying food conditions. This may explain why  
274 most studies did not find evidence for maternal adjustment of testosterone deposition in eggs in  
275 relation to food conditions, including in the pigeon<sup>42</sup>. Moreover, this system of competing  
276 asymmetries does not require parents to make assumptions about the future food conditions at the  
277 time of egg laying, long before the chicks hatch (in the pigeon 18 days).

278           The context dependent effects of yolk testosterone reported here may also explain earlier  
279 reported inconsistencies in the effects of *in ovo* injections of androgens<sup>23</sup>. Interestingly, the most cited  
280 study for the detrimental effects of yolk testosterone on survival, the study on American kestrels  
281 (*Falco sparverius*)<sup>51</sup>, was conducted in a poor food year (Sockman, personal communication). In  
282 contrast, a replication of that study on the closely related Eurasian kestrels (*F. tinnunculus*) in a good  
283 year found a positive effect (C. Dijkstra, J. Boonekamp and T.G.G. Groothuis, unpublished data).  
284 Similarly, a recently published field study on spotless starlings (*Sturnus unicolor*) reported that only  
285 among the second broods, when the food availability is generally deteriorated compared to when the  
286 parents raised their first broods, nestling mortality was significantly higher for the nestlings from  
287 androgen-treated eggs<sup>52</sup>. Another study by Cucco et al. (2009)<sup>53</sup>, who injected different doses of  
288 testosterone into grey partridge (*Perdix perdix*) egg yolks and supplemented the diet with  $\beta$ -carotene  
289 in half of the chicks from each testosterone treatment, found that supplemented  $\beta$ -carotene can remedy  
290 the immunosuppressive effects induced by higher levels of yolk testosterone. It is therefore important  
291 that future studies testing the effect of yolk hormones take into account the food conditions.

292           Our understanding of the mechanism underlying the context dependent effects of maternal  
293 yolk testosterone, however, remains to have several unanswered questions. The enhancing effects of  
294 testosterone on growth in good food conditions may have been due to an increase in begging  
295 behaviour, as has been found in several studies<sup>54-56</sup>, which will result in higher food delivery by the  
296 parents. Furthermore, the food dependent effects of elevated maternal testosterone on growth may  
297 also have been mediated by increases in basal metabolic rate (BMR), as elevated prenatal testosterone  
298 exposure increases BMR<sup>27-29</sup>. Indeed, during food supplementation, increased BMR has been shown  
299 to enhance growth, whereas during food restriction, increased BMR can depress growth<sup>57,58</sup>. Therefore,  
300 the higher mortality of chicks from testosterone-injected eggs observed in the poor food condition  
301 may have been the result of a higher, but unsatisfied, energy demand. Our findings showed that most  
302 nestling mortality occurred after 8 days of age (Fig. 1). In this species, the energy and nutrient  
303 demands of chicks most likely peak around 10 days after hatching, and the higher energy demand  
304 around that time may have induced a fatally negative energy balance of testosterone-injected chicks in

305 the poor food conditions. Moreover, if prenatal testosterone increased begging behaviour in the poor  
306 food conditions, this would have further exacerbated energy loss and the parents would not have been  
307 able to compensate it.

308 Our results indicate that regardless of food conditions, testosterone-injected fledglings showed  
309 a weaker response to an immune challenge (injected sheep red blood cells). This effect of  
310 immunosuppression is consistent with previous studies in other avian species<sup>30-34</sup>. Although the  
311 interaction effect on chicks' immune response between the yolk testosterone injection and food  
312 conditions was not significant, Figure 4 obviously suggests that a clear difference was only observed  
313 among chicks reared under good food conditions. This is likely due to a floor effect as food restriction  
314 induced already a very strong suppression of the immune response, and the suppressed responses  
315 would be difficult to differentiate as the antibody titers cannot go below 0. This also suggests that  
316 high resource inputs are required to maintain good immune function<sup>59</sup>. It is possible that the high rate  
317 of energy expenditure caused by maternal testosterone exposure, combined with the low rates of  
318 energy inputs due to poor food conditions, left insufficient resources for maintaining the immune  
319 system.

320 In conclusion, our results suggest the co-evolution of two maternal effects to optimize the  
321 final brood size that are adaptive for the mother but not necessarily optimal for all offspring. The  
322 context dependent effects of maternally deposited testosterone on chick survival can be used as an  
323 explanation for the apparent discrepancies in the literature on this subject that currently hamper  
324 progress in our understanding to the functions of maternal hormones. When these are taken into  
325 consideration, the field of hormone-mediated maternal effects may move forward substantially.

326

### 327 **Acknowledgement**

328 We dedicate this paper to the memory of Dr. Cor Dijkstra, a beloved teacher, mentor, and friend, who  
329 peacefully left us in November, 2017. We greatly appreciate all animal care takers for their help,  
330 Roelie Veenstra-Wiegman for the help on sexing, Bernd Riedstra for the help on SRBC test, and  
331 Charlotte Deerenberg for valuable comments on the manuscript.

332 **References**

- 333 1. Mock, D. W. & Parker, G. A. *The evolution of sibling rivalry*. (Oxford University Press, New  
334 York, 1997).
- 335 2. Roulin, A. & Dreiss, A. N. Sibling competition and cooperation over parental care. In *The*  
336 *Evolution of Parental Care*. (ed. Royle, N. J., Smiseth, P. T. & Kölliker, M.) 133-149 (Oxford  
337 University Press, 2012).
- 338 3. Frank, G. F., Glickman, S. E. & Licht, P. Fatal sibling aggression, precocial development, and  
339 androgens in neonatal spotted hyenas. *Science* **252**, 702-704 (1991).
- 340 4. Hofer, H. & East M. L. Siblicide in Serengeti spotted hyenas: a long-term study of maternal input  
341 and cub survival. *Behav. Ecol. Sociobiol.* **62**, 341-351 (2008).
- 342 5. Drummond, H. & Garcia-Chavelas, C. Food shortage influences sibling aggression in the blue-  
343 footed booby. *Anim. Behav.* **37**, 806-819 (1989).
- 344 6. Stephenson, A. G. Flower and fruit abortion: proximate causes and ultimate functions. *Annu. Rev.*  
345 *Ecol. Syst.* **12**, 253-279 (1981).
- 346 7. Hudson, R & Trillmich, F. Sibling competition and cooperation in mammals: challenges,  
347 developments and prospects. *Behav. Ecol. Sociobiol.* **62**, 299-307 (2008).
- 348 8. Andersen, I. L., Nævdal, E. & Bøe, K. E. Maternal investment, sibling competition, and offspring  
349 survival with increasing litter size and parity in pigs (*Sus scrofa*). *Behav. Ecol. Sociobiol.* **65**:  
350 1159-1167 (2011).
- 351 9. Osawa, N. Sibling cannibalism in the ladybird beetle *Harmonia axyridis*: fitness consequences for  
352 mother and offspring. *Res. Popul. Ecol.* **34**, 45-55 (1992).
- 353 10. Groothuis, T. G. G. & Schwabl, H. Hormone-mediated maternal effects in birds: mechanisms  
354 matter but what do we know of them? *Phil. Trans. R. Soc. B* **363**, 1647-1661 (2008).
- 355 11. Carere, C. & Balthazart, J. Sexual versus individual differentiation: the controversial role of avian  
356 maternal hormones. *Trends Endocrinol. Metab.* **18**, 73-80 (2007).
- 357 12. Donohue, K. Completing the cycle: maternal effects as the missing link in plant life histories. *Phil.*  
358 *Trans. R. Soc.* **364**, 1059-1074 (2009).

- 359 13.Mousseau, T. A. & Dingle, H. Maternal effects in insect life histories. *Annu. Rev. Entomol.* **36**,  
360 511– 534 (1991).
- 361 14.Bowden, R. M., Ewert, M. A. & Nelson C. E. Environmental sex determination in a reptile varies  
362 seasonally and with yolk hormones. *Proc. R. Soc. B* **267**, 1745-1749 (2000).
- 363 15.Schaafsma, S. M. & Groothuis, T. G. G. Sex-specific effects of maternal testosterone on  
364 lateralization in a cichlid fish. *Anim. Behav.* **83**,437–443 (2012).
- 365 16.Cottrell, E. C. & Seckl, J. R. Prenatal stress, glucocorticoids and the programming of adult disease.  
366 *Front. Behav. Neurosci* **3**, 19 (2009).
- 367 17.Dloniak, S. M., French, J. A. & Holekamp, K. E. Rank-related maternal effects of androgens on  
368 behavior in wild spotted hyaenas. *Nature* **440**, 1190-1193.
- 369 18.Schwabl, H. Yolk is a source of maternal testosterone for developing birds. *Proc. Natl. Acad. Sci.*  
370 *U.S.A.* **90**, 11446-11450 (1993).
- 371 19.Groothuis, T. G. G., Müller, W., von Engelhardt, N., Carere, C. & Eising, C. Maternal hormones  
372 as a tool to adjust offspring phenotype in avian species. *Neurosci. Biobehav. Rev.* **29**, 329-352  
373 (2005).
- 374 20.Eising, C. M., Eikenaar, C., Schwabl, H., Groothuis, T. G. G. Maternal androgens in black-headed  
375 gull (*Larus ridibundus*) eggs: consequences for chick development. *Proc. R. Soc. Lond. B* **268**,  
376 839-846 (2001).
- 377 21.Müller, M. S., Roelofs, Y., Erikstad, K. E. & Groothuis, T. G. G. Maternal androgens increase  
378 sibling aggression, dominance, and competitive ability in the siblicidal black-legged  
379 kittiwake (*Rissa tridactyla*). *PLoS One* **7**, e47763 (2012).
- 380 22.Gil, D. Hormones in avian eggs: physiology, ecology and behavior. *Adv. Study Behav.* **38**, 337-398  
381 (2008).
- 382 23.von Engelhardt, N. & Groothuis, T. G. G. Maternal Hormones in Avian Eggs. In *Hormones and*  
383 *Reproduction of Vertebrates. Vol. 4: Birds.* (ed. Norris, D. O. & Lopez, K. H.) 91-127 (Elsevier  
384 Inc., Amsterdam, 2011).



- 385 24. Amundsen, T. & Slagsvold, T. Hatching asynchrony: facilitating adaptive or maladaptive brood  
386 reduction? *Acta International Ornithological Congress, Christchurch, New Zealand XX*: 1707-  
387 1719 (1991).
- 388 25. Sockman, K. W., Sharp, P. J. & Schwabl, H. Orchestration of avian reproductive effort: an  
389 integration of the ultimate and proximate bases for flexibility in clutch size, incubation behaviour,  
390 and yolk androgen deposition. *Biol. Rev.* **81**, 629-666 (2006).
- 391 26. Müller, M. S. & Groothuis, T. G. G. Within-clutch variation in yolk testosterone as an adaptive  
392 maternal effect to modulate avian sibling competition: evidence from a comparative study. *Am.*  
393 *Nat.* **181**, 125-136 (2013).
- 394 27. Tobler, M., Nilsson, J.-Å. & Nilsson, J. F. Costly steroids: egg testosterone modulates nestling  
395 metabolic rate in the zebra finch. *Biol. Lett.* **3**, 408-410 (2007).
- 396 28. Nilsson, J. F., Tobler, M., Nilsson, J.-Å. & Sandell, M. I. Long-lasting consequences of elevated  
397 yolk testosterone for metabolism in the zebra finch. *Physiol. Biochem. Zool.* **84**, 287-291 (2011).
- 398 29. Ruuskanen, S. et al. Long-lasting effects of yolk androgens on phenotype in the pied flycatcher  
399 (*Ficedula hypoleuca*). *Behav. Ecol. Sociobiol.* **67**, 361-372 (2013).
- 400 30. Andersson, S., Uller, T., Löhmus, M. & Sundström, F. Effects of egg yolk testosterone on growth  
401 and immunity in precocial birds. *J. Evol. Biol.* **17**, 501-505 (2004).
- 402 31. Groothuis, T. G. G., Eising, C. M., Dijkstra, C. & Müller, W. Balancing between costs and  
403 benefits of maternal hormone deposition in avian eggs. *Biol. Lett.* **1**, 78-81 (2005).
- 404 32. Müller, W. et al. Prenatal androgen exposure modulates cellular and humoral immune function of  
405 black-headed gull chicks. *Proc. R. Soc. B* **272**, 1971-1977 (2005).
- 406 33. Navara, K. J., Hill, G. E. & Mendonça, M. T. Variable effects of yolk androgens on growth,  
407 survival, and immunity in eastern bluebird nestlings. *Physiol. Biochem. Zool.* **78**, 570-578 (2005).
- 408 34. Sandell, M. I., Tobler, M. & Hasselquist, D. Yolk androgens and the development of avian  
409 immunity: an experiment in jackdaws (*Corvus monedula*). *J. Exp. Biol.* **212**, 815-822 (2009).
- 410 35. Tobler, M. & Sandell, M. I. Sex-specific effects of prenatal testosterone on nestling plasma  
411 antioxidant capacity in the zebra finch. *J. Exp. Biol.* **212**, 89-94 (2009).

- 412 36.Galván, I. & Alonso-Alvarez, C. Yolk testosterone shapes the expression of a melanin-based  
413 signal in great tits: an antioxidant-mediated mechanism? *J. Exp. Biol.* **213**, 3127-3130 (2010).
- 414 37.Noguera, J. C., Alonso-Alvarez, C., Kim, S.-Y., Morales, J. & Velando, A. Yolk testosterone  
415 reduces oxidative damages during postnatal development. *Biol. Lett.* **7**, 93-95 (2011).
- 416 38.Tobler, M., Sandell, M. I., Chiriack, S. & Hasselquist, D. Effects of prenatal testosterone exposure  
417 on antioxidant status and bill color in adult zebra finches. *Physiol. Biochem. Zool.* **86**, 333-345  
418 (2013).
- 419 39.Treidel, L. A., Whitley, B. N., Benowitz-Fredericks, Z. M., Haussmann, M.F. Prenatal exposure to  
420 testosterone impairs oxidative damage repair efficiency in the domestic chicken (*Gallus gallus*).  
421 *Biol. Lett.* **9**, 20130684 (2013).
- 422 40.Johnston, R. E. & Janiga, M. *Feral Pigeons*. (Oxford University Press, New York, 1995).
- 423 41.Goerlich, V. C., Dijkstra, C., Schaafsma, S. M. & Groothuis, T. G. G. Testosterone has a long-term  
424 effect on primary sex ratio of first eggs in pigeons-in search of a mechanism. *Gen. Comp.*  
425 *Endocrinol.* **163**, 184-192 (2009).
- 426 42.Hsu, B.-Y., Dijkstra, C., Darras, V. M., de Vries, B., Groothuis & T. G. G. Maternal adjustment or  
427 constraint: differential effects of food availability on maternal deposition of macro-nutrients,  
428 steroids, and thyroid hormones in rock pigeon eggs. *Ecol. Evol.* **6**, 397-411 (2016).
- 429 43.Goerlich, V. C., Dijkstra, C., Boonekamp, J. J. & Groothuis, T. G. G. Change in body mass can  
430 overrule the effects of maternal testosterone on primary offspring sex ratio of first eggs in homing  
431 pigeons. *Physiol. Biochem. Zool.* **83**, 490-500 (2010).
- 432 44.Jacquin, L., Récapet, C., Bouche, P., Leboucher, G. & Gasparini, J. Melanin-based coloration  
433 reflects alternative strategies to cope with food limitation in pigeons. *Behav. Ecol.* **23**, 907-915  
434 (2012).
- 435 45.R Development Core Team. R: A language and environment for statistical computing. R  
436 Foundation for Statistical Computing, Vienna (2018).
- 437 46.Bates, D., Maechler, M., Bolker, B. & Walker, S. Fitting linear mixed-effects models using lme4. *J.*  
438 *Stat. Softw.* **67**, 1-48 (2015).

- 439 47.Halekoh, U., Højsgaard, S. A Kenward-Roger approximation and parametric bootstrap methods  
440 for tests in linear mixed models – the R package pbkrtest. *J. Stat. Softw.* **59**, 1-30 (2014).
- 441 48.Krist, M. Egg size and offspring quality: a meta-analysis in birds. *Biol. Rev.* **86**, 692-716 (2011).
- 442 49.de Rosario-Martinez, H.phia: Post-hoc interaction analysis. R package version 0.2-1. (2015).
- 443 50.Therneau, T. A package for survival analysis in S. version 2.38. (2015).
- 444 51.Sockman, K. W. & Schwabl, H. Yolk androgens reduce offspring survival. *Proc. R. Soc. B* **267**,  
445 1451-1456 (2000).
- 446 52.Muriel, J. et al. Context-dependent effects of yolk androgens on nestling growth and immune  
447 function in a multibrooded passerine. *J. Evol. Biol.* **28**, 1476-1488 (2015).
- 448 53.Cucco, M., Guasco, B., Malacarne, G., Ottonelli, R. & Tanvez, A. Yolk testosterone levels and  
449 dietary carotenoids influence growth and immunity of grey partridge chicks. *Gen. Comp.*  
450 *Endocrinol.* **156**, 418-425 (2008).
- 451 54.Eising, C. M. & Groothuis, T. G. G. Yolk androgens and begging behaviour in black-headed gull  
452 chicks: an experimental field study. *Anim. Behav.* **66**, 1027-1034 (2003).
- 453 55.von Engelhardt, N., Carere, C., Dijkstra, C. & Groothuis, T. G. G. Sex-specific effects of yolk  
454 testosterone on survival, begging, and growth of zebra finches. *Proc. R. Soc. B* **273**, 65-70 (2006).
- 455 56.Noguera, J. C., Kim, S.-Y. & Velando, A. Maternal testosterone influences a begging component  
456 that makes fathers work harder in chick provisioning. *Horm. Behav.* **64**, 19-25 (2013).
- 457 57.Derting, T. L. Metabolism and food availability as regulators of production in juvenile cotton rats.  
458 *Ecology* **70**, 587-595 (1989).
- 459 58.Auer, S. K, Salin, K., Rudolf, A. M., Anderson, G. J. & Metcalfe, N.B. Flexibility in metabolic  
460 rate confers a growth advantage under changing food availability. *J. Anim. Ecol.* **84**, 1405-1411  
461 (2015).
- 462 59.Hasselquist, D. & Nilsson, J.-Å. Physiological mechanisms mediating costs of immune responses:  
463 what can we learn from studies of birds? *Anim. Behav.* **83**, 1303-1312 (2012).

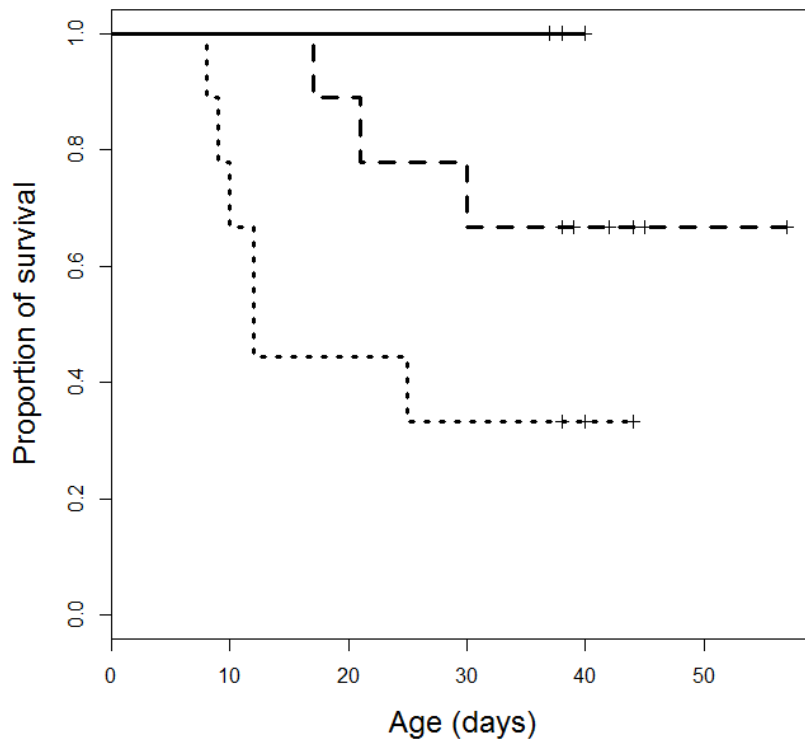

464

465 **Figure 1.** Survival curves of testosterone- and control-chicks. In good food conditions (solid line),  
466 chicks from both egg injection treatment had 100% survival so curves for testosterone- and control-  
467 chicks overlap completely. In poor food conditions, Chicks from testosterone-injected eggs (dotted  
468 line) had lower survival than control chicks (dashed line).

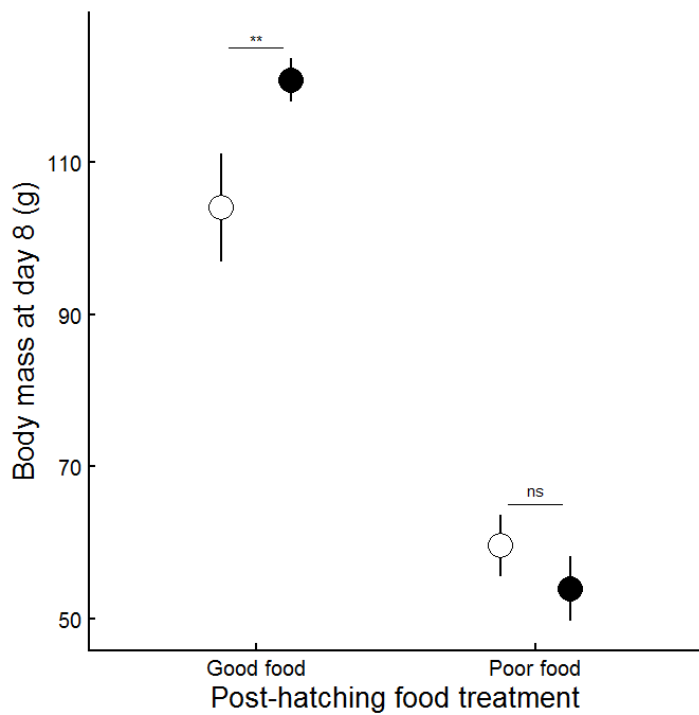

469

470 **Figure 2.** Means $\pm$ SE of chick body mass at day 8 after hatching. Closed dots: chicks from  
471 testosterone-injected eggs; open dots: control chicks from vehicle-injected eggs. Post-hoc analysis: \*\*,  
472  $p < 0.01$ ; ns,  $p > 0.05$ .

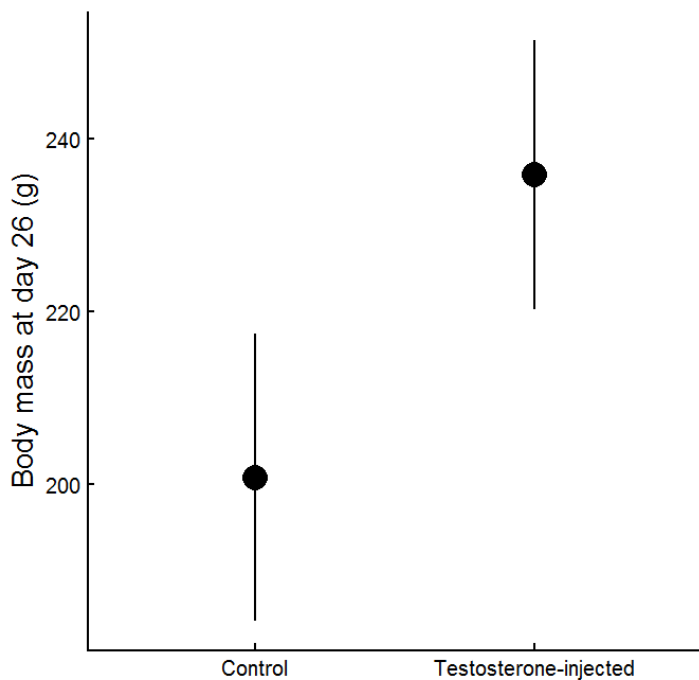

473

474 **Figure 3.** Mean  $\pm$  SE of chick body mass at day 26, around fledging.

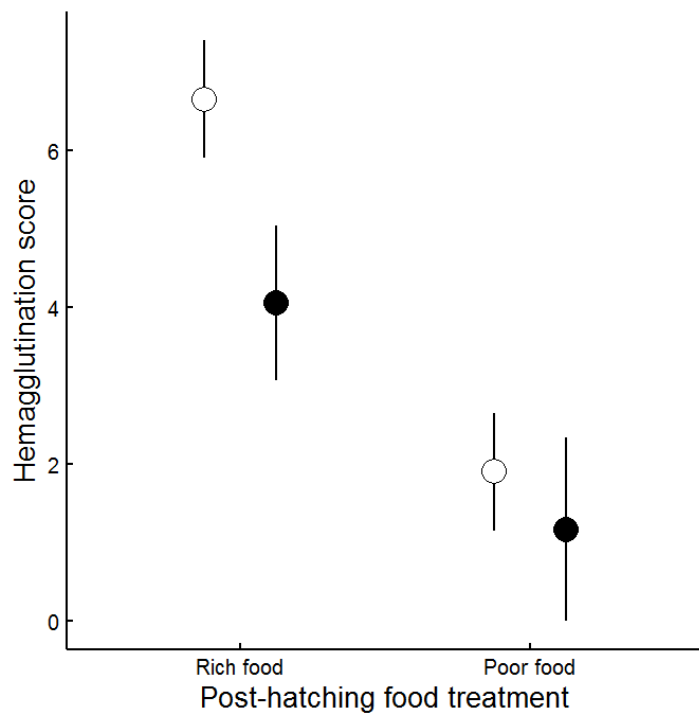

475

476 **Figure 4.** Mean  $\pm$  SE of the score of anti-SRBC antibody titres from hemagglutination assay. Closed

477 dots: chicks from testosterone-injected eggs; open dots: control chicks from vehicle-injected eggs.
